# Supplementary material
Source: PubMed Central journal article supplement (PMC5878954)

**Appendix 2 (as supplied by the authors)**

| <i>Supplemental Table 1. Patient baseline symptom and perception data</i>                                                     |                        |
|-------------------------------------------------------------------------------------------------------------------------------|------------------------|
| <b>Measure</b>                                                                                                                | <b>Mean Value (SD)</b> |
| <b>Beliefs about Medications Questionnaire</b>                                                                                |                        |
| Specific-Necessity (scale 5-25, higher values indicate greater belief in necessity of medications)                            | 18.5 (2.9)             |
| Specific-Concerns (scale 5-25, higher values indicate greater concern about medications)                                      | 14.2 (3.5)             |
| General Overuse (scale 3-15, higher values indicate stronger belief that medications are overused)                            | 9.3 (2.2)              |
| General Harm (scale 4-20, higher values indicate stronger beliefs that medications are harmful)                               | 10.2 (2.2)             |
| <b>Patient Attitudes Towards Deprescribing (n (%) agreeing or strongly agreeing with the statement)</b>                       |                        |
| I feel that I am taking a large number of medications.                                                                        | 33 (61%)               |
| I am comfortable with the number of medications that I am taking.                                                             | 28 (52%)               |
| I believe that all my medications are necessary.                                                                              | 30 (56%)               |
| If my doctor said it was possible I would be willing to stop one or more of my regular medications.                           | 49 (91%)               |
| I would like to reduce the number of medications that I am taking.                                                            | 34 (63%)               |
| I feel that I may be taking one or more medications that I no longer need.                                                    | 15 (28%)               |
| I would accept taking more medications for my health conditions.                                                              | 37 (69%)               |
| I have a good understanding of the reasons I was prescribed each of my medications.                                           | 38 (70%)               |
| Having to pay for less medications would play a role in my willingness to stop one or more of my medications.                 | 15 (28%)               |
| I believe one or more of my medications is giving me side effects.                                                            | 23 (43%)               |
| I have previously tried to stop a regular medication (with a doctor's knowledge)                                              | 18 (33%)               |
| I would be comfortable with stopping a medication on a pharmacist's recommendation (as long as their physician was informed). | 40 (74%)               |
| <b>Preferred follow-up after stopping a medication</b>                                                                        |                        |
| Face-to-face appointment                                                                                                      | 36 (67%)               |
| Phone call                                                                                                                    | 14 (26%)               |
| Written information in mail                                                                                                   | 1 (2%)                 |
| No follow-up                                                                                                                  | 3 (6%)                 |
| <b>Edmonton Symptom Assessment System-revised, Mean Score (SD)</b>                                                            |                        |
| Pain                                                                                                                          | 3.6 (3.6)              |
| Tiredness                                                                                                                     | 5.2 (3.5)              |
| Drowsiness                                                                                                                    | 4.4 (3.4)              |
| Nausea                                                                                                                        | 1.2 (2.8)              |
| Lack of Appetite                                                                                                              | 3.1 (3.7)              |
| Shortness of Breath                                                                                                           | 3.8 (3.9)              |
| Depression                                                                                                                    | 2.3 (3.2)              |
| Anxiety                                                                                                                       | 1.9 (3.1)              |
| Wellbeing                                                                                                                     | 4.8 (2.6)              |

|                             |           |
|-----------------------------|-----------|
| Number of Symptom Scores >6 | 2.1 (2.0) |
| SD- Standard Deviation      |           |

Supplemental Figure 1: Patient perceptions of medication rationalization

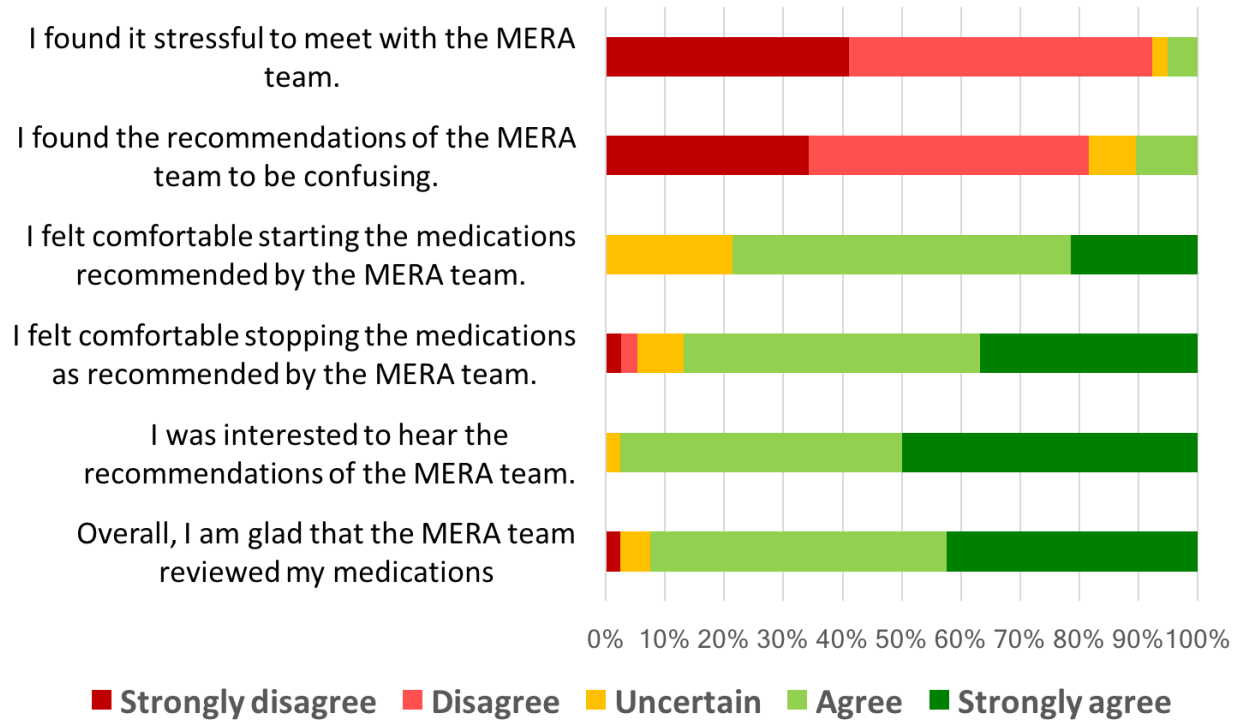

Supplement: supp_6.1.E87_2017-0134-2-at.pdf [file supp_6.1.E87_2017-0134-2-at.pdf]
